CORRECTION

# Correction: The effects of tryptophan loading on Attention Deficit Hyperactivity Disorder in adults: A remote double blind randomised controlled trial

*PLOS One*

## Notice of Republication

The title was printed incorrectly. The correct title is: The effects of tryptophan loading on Attention Deficit Hyperactivity Disorder in adults: A remote double blind randomised controlled trial”.

## Supporting information

**S1 File. Originally published, uncorrected article.**  
(PDF)

**S2 File. Republished, corrected article.**  
(PDF)

## Reference

1. Dinu LM, Singh SN, Baker NS, Georgescu AL, Overton PG, Domett EJ. The effects of tryptophan loading on Attention Deficit Hyperactivity in adults: A remote double blind randomised controlled trial. PLoS ONE. 2023;8(11):e0294911. <https://doi.org/10.1371/journal.pone.0294911> PMID: [38033150](https://pubmed.ncbi.nlm.nih.gov/38033150/)

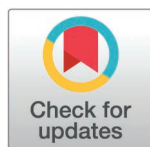

## OPEN ACCESS

**Citation:** *PLOS One* (2025) Correction: The effects of tryptophan loading on Attention Deficit Hyperactivity Disorder in adults: A remote double blind randomised controlled trial. PLoS One 20(6): e0327062. <https://doi.org/10.1371/journal.pone.0327062>

**Published:** June 25, 2025

**Copyright:** © 2025 *PLOS One*. This is an open access article distributed under the terms of the [Creative Commons Attribution License](https://creativecommons.org/licenses/by/4.0/), which permits unrestricted use, distribution, and reproduction in any medium, provided the original author and source are credited.
